# Supplementary material
Source: publisher figshare collection journal article supplement (https://tandf.figshare.com/ndownloader/files/28947784)
Supplement: Supplementary file 1 [file 28947784]

**Disclosure statement**

No potential conflict of interest was reported by the authors.
